# Supplementary material for: Generation of kidney tubular organoids from human pluripotent stem cells
Source: PubMed Central journal article supplement (PMC5159864; doi:10.1038/srep38353), 2016-12-16
Supplement: srep38353-s1.pdf [file srep38353-s1.pdf]

## **Generation of kidney tubular organoids from human pluripotent stem cells**

Shintaro Yamaguchi<sup>1</sup>, Ryuji Morizane<sup>1,2,3,4</sup>, Koichiro Homma<sup>1,5\*</sup>, Toshiaki Monkawa<sup>1,6</sup>, Sayuri Suzuki<sup>1</sup>, Shizuka Fujii<sup>1</sup>, Muneaki Koda<sup>1</sup>, Ken Hiratsuka<sup>1</sup>, Maho Yamashita<sup>7</sup>, Tadashi Yoshida<sup>7</sup>, Shu Wakino<sup>1</sup>, Koichi Hayashi<sup>1</sup>, Junichi Sasaki<sup>5</sup>, Shingo Hori<sup>5</sup> & Hiroshi Itoh<sup>1</sup>

1. Department of Internal Medicine, Keio University School of Medicine, 35 Shinanomachi, Shinjuku-ku, Tokyo 160-8582, Japan

2. Renal Division, Brigham and Women's Hospital, 75 Francis Street, Boston, MA 02115, USA

3. Department of Medicine, Harvard Medical School, 25 Shattuck St, Boston, MA 02115, USA

4. Harvard Stem Cell Institute, 7 Divinity Ave, Cambridge, MA 02138, USA

5. Emergency and Critical Care Medicine, Keio University School of Medicine, 35 Shinanomachi, Shinjuku-ku, Tokyo 160-8582, Japan

6. Medical Education Center, Keio University School of Medicine, 35 Shinanomachi, Shinjuku-ku, Tokyo 160-8582, Japan

7. Apheresis and Dialysis Center, Keio University School of Medicine, 35 Shinanomachi, Shinjuku-ku, Tokyo 160-8582, Japan

\*Correspondence and requests for materials should be addressed to Koichiro Homma (email: homma@keio.jp)

Department of Internal Medicine, Keio University School of Medicine, 35 Shinanomachi, Shinjuku-ku, Tokyo 160-8582, Japan      Tel: +81-3-3353-1211

## Figure legends

### Supplemental Figure 1. The expressions of nephron progenitor markers in hESCs.

a-c) Quantitative evaluation of gene expression of nephron progenitor markers (*GDNF*, *CITED1*, *HOXD11*) on day 3 and 10 of differentiation. Transcript expression levels were normalized to *GAPDH* (n =3). Values shown are the means  $\pm$  SEM.

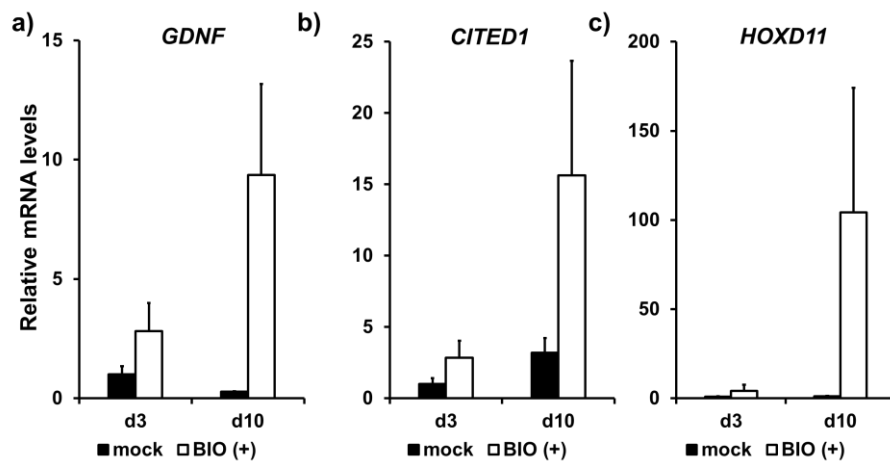

**Supplemental Figure 2. Structures generated by KSP negative cells in 3D Matrigel.**

KSP negative/TRA1-60 negative cells purified by flow cytometry after 10 d of differentiation were transferred onto Matrigel and cultured for 24h. KSP negative cells formed petal-like structures which were negative for KSP and MEGALIN expression. Scale bars; 50  $\mu$ m.

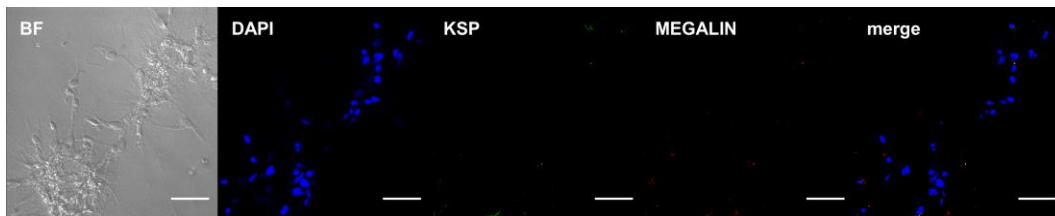

**Supplemental Figure 3.**

**Primers for quantitative Real-Time. PCR, polymerase chain reaction.**

| Gene              |         | Sequence                              |
|-------------------|---------|---------------------------------------|
| <i>OCT3/4</i>     | Forward | TGA AGC TGG AGA AGG AGA AGC TG        |
|                   | Reverse | GCA GAT GGT CGT TTG GCT GA            |
| <i>BRACHYURY</i>  | Forward | GAC AGG TAC CCA ACC CTG AGG           |
|                   | Reverse | AGC ATG GAT AAA CAT GCA GGT GAG       |
| <i>PAX2</i>       | Forward | TGT CAG CAA AAT CCT GGG CAG           |
|                   | Reverse | GTC GGG TTC TGT CGT TTG TAT T         |
| <i>OSR1</i>       | Forward | AGA GTC CTG GAC TGG CAG AAT C         |
|                   | Reverse | AGA CCA CAG ATA TAT TCA CTC CAA AGA G |
| <i>WT-1</i>       | Forward | CAC AGC ACA GGG TAC GAG AG            |
|                   | Reverse | CAA GAG TCG GGG CTA CTC CA            |
| <i>KSP</i>        | Forward | CAT CCT TGT AGG CAC CCT GGT AG        |
|                   | Reverse | TGA CAT GGT CCA GTG GGT GAA           |
| <i>MEGALIN</i>    | Forward | GGC CTG CTA TAA CAC CAG TCA           |
|                   | Reverse | ACT CAT TGT GCA AGC ATA TCT CA        |
| <i>AQP 1</i>      | Forward | TAA CCC TGC TCG GTC CTT TG            |
|                   | Reverse | AGT CGT AGA TGA GTA CAG CCA G         |
| <i>AQP 2</i>      | Forward | GCT CCG CTC CAT AGC CTT C             |
|                   | Reverse | GGG TGC CAA TAC CCA AGC C             |
| <i>PAX6</i>       | Forward | TGGGCAGGTATTACGAGACTG                 |
|                   | Reverse | ACTCCCGCTTATACTGGGCTA                 |
| <i>NKX2.5</i>     | Forward | CCAAGGACCCTAGAGCCGAA                  |
|                   | Reverse | ATAGGCGGGGTAGGCGTTAT                  |
| <i>GGT</i>        | Forward | TGAGCCCAGAAGTGAGAGCAGTTG              |
|                   | Reverse | ATGTCCACCAGCTCAGAGAGGGT               |
| <i>CD13</i>       | Forward | GACCAAAGTAAAGCGTGGAATCG               |
|                   | Reverse | TCTCAGCGTCACCCGGTAG                   |
| <i>ATP1B1</i>     | Forward | CCGGTGGCAGTTGGTTTAAGA                 |
|                   | Reverse | GCATCACTTGGATGGTTCCGA                 |
| <i>SGLT1</i>      | Forward | TACCTGAGGAAGCGGTTTGA                  |
|                   | Reverse | CGAGAAGATGTCTGCCGAGA                  |
| <i>UROMODULIN</i> | Forward | CGGCGGCTACTACGTCTAC                   |
|                   | Reverse | GTCTGTGCAGTACGCCAGG                   |
| <i>SLC12A3</i>    | Forward | CCTGGGTGGAGACCTTCATTC                 |
|                   | Reverse | GAGCCCCAATTTACCTCTGGC                 |
| <i>GNDF</i>       | Forward | GGCAGTGCTTCCTAGAAGAGA                 |
|                   | Reverse | AAGACACAACCCCGGTTTTTG                 |
| <i>CITED1</i>     | Forward | CCTCACCTGCGAAGGAGGA                   |
|                   | Reverse | GGAGAGCCTATTGGAGATCCC                 |
| <i>HOXD11</i>     | Forward | AAAAAGCGCTGTCCCTATACCA                |
|                   | Reverse | TGAGGTTGAGCATCCGAGAGA                 |
| <i>GAPDH</i>      | Forward | GTC AGT GGT GGA CCT GAC CT            |
|                   | Reverse | AGG GGT CTA CAT GGC AAC TG            |
